# Supplementary material for: Mitochondria-derived small RNAs as diagnostic biomarkers in lung cancer patients through a novel ratio-based expression analysis methodology
Source: PubMed Central journal article supplement — Genes Dis. 2022 Aug 7;10(3):1055–61. doi: 10.1016/j.gendis.2022.07.013 (PMC10308114; doi:10.1016/j.gendis.2022.07.013), 2022-08-07
Supplement: mmc1.pdf [file mmc1.pdf]

## **Supplementary Appendix**

**Identifying Ratio-Based mitochondria-derived small RNA Biomarkers and Predicted Targets in Lung Cancer Patients**

**Supplementary Table S1.** Random forest RF mean decrease of accuracy and mean decrease Gini score rank

| Names                  | Cancer   | Normal   | MeanDecreaseAccuracy | MeanDecreaseGini |
|------------------------|----------|----------|----------------------|------------------|
| t00012442_to_t00014455 | 2.813203 | 3.884357 | 3.602012062          | 0.571343254      |
| t00022458_to_t00024522 | 3.001672 | 3.111537 | 3.418629809          | 0.459544773      |
| t00022458_to_t00024059 | 3.171826 | 2.694473 | 3.211095152          | 0.311141109      |
| t00012442_to_t00015863 | 2.498038 | 3.002299 | 3.013482146          | 0.407522509      |
| t00016493_to_t00024522 | 2.97388  | 2.872698 | 2.971718999          | 0.344113133      |
| t00013071_to_t00014455 | 2.097736 | 2.240428 | 2.8415188            | 0.361319388      |
| t00006414_to_t00012442 | 2.718658 | 2.823025 | 2.828277356          | 0.423314536      |
| t00012442_to_t00029490 | 2.192006 | 2.52132  | 2.698881332          | 0.300067919      |
| t00012442_to_t00022458 | 2.44021  | 2.042033 | 2.62199793           | 0.212277442      |
| t00013071_to_t00022458 | 2.080687 | 2.149495 | 2.423408375          | 0.254696938      |
| t00006887_to_t00012442 | 1.588041 | 2.330808 | 2.421929829          | 0.224876808      |
| t00011350_to_t00014455 | 2.137712 | 2.105863 | 2.39653951           | 0.174247289      |
| t00015863_to_t00028073 | 2.335878 | 2.357527 | 2.384112687          | 0.195484131      |
| t00010700_to_t00012442 | 1.741763 | 2.488022 | 2.313886266          | 0.279656798      |
| t00014455_to_t00024522 | 2.268199 | 2.299152 | 2.312357154          | 0.329009639      |
| t00013048_to_t00022458 | 2.225821 | 2.157117 | 2.309112597          | 0.234587848      |
| t00012442_to_t00013099 | 2.336763 | 1.807395 | 2.278217175          | 0.222568182      |
| t00015863_to_t00020738 | 2.365117 | 2.020943 | 2.269489942          | 0.198870243      |
| t00005497_to_t00022458 | 2.150656 | 2.269011 | 2.25767032           | 0.252517732      |
| t00008082_to_t00014455 | 2.291091 | 2.057791 | 2.235313893          | 0.23373088       |

**Supplementary Table S2.** The mitochondria-derived RNA (mtRNA) signature

| ID        | Sequence                               | Length | Annotation              |
|-----------|----------------------------------------|--------|-------------------------|
| t00003437 | TGAATCTGACAACAGAGGCTTACGACCCCTTA       | 32     | mt_tRNA-His-GTG         |
| t00004817 | GAGAAAGCTCACAAGAAGCTGCTAAC             | 25     | mt_tRNA-Ser-GCT_5_end   |
| t00005497 | GAAAAAGTCATGGAGGCCATGGGGTT             | 26     | mt_tRNA-Ser-TGA_5_end   |
| t00006199 | AAGACTTTTTCTCTGACCA                    | 19     | mt_tRNA-Pro-TGG_CCA_end |
| t00006292 | TAGGATGGGGTGTGATAGGTGGCACGGAGAATTT     | 34     | mt_tRNA-Gln-TTG_5_end   |
| t00006414 | GTTTAGACGGGCTCAC                       | 16     | mt_tRNA-Phe-GAA         |
| t00009731 | CAGAGTGTAGCTTAACA                      | 17     | mt_tRNA-Val-TAC_5_end   |
| t00011195 | TGAATCTGACAACAGAGGCTTACGACCCCTTATTTACC | 38     | mt_tRNA-His-GTG_3_end   |
| t00012442 | GGTAAAATGGCTGAGTGAAGCATTGGACTGTA       | 32     | mt_tRNA-Tyr-GTA_5_end   |
| t00014475 | TAAATACAGACCAAGAGCCTTC                 | 22     | mt_tRNA-Trp-TCA         |
| t00015616 | CACTGTAAAGCTAACT                       | 16     | mt_tRNA-Lys-TTT_5_end   |
| t00020738 | AGATTTCAACTTAACTTGACCGCTCTGA           | 28     | mt_tRNA-Val-TAC_3_end   |
| t00021234 | TTTTCCAAGGACACCA                       | 16     | mt_tRNA-Thr-TGT_CCA_end |
| t00021504 | AGTAAGGTCAGCTAAATAAGCTATCGGGCCCA       | 32     | mt_tRNA-Met-CAT_5_end   |
| t00024522 | GTAAAGATGGCAGAGCCCGGTAATCGCATA         | 30     | mt_tRNA-Leu-TAA_5_end   |

**Supplementary Table S3.** A list of mtRNAs that FDR less than 0.001 when the unpaired student t-test was evaluated

| mtRNA                  | p value  | Fold change(Cancer/Normal) | log2FC   | FDR      |
|------------------------|----------|----------------------------|----------|----------|
| t00011350_to_t00014138 | 2.97E-09 | 0.240556559                | -2.05555 | 4.57E-06 |
| t00012442_to_t00027940 | 1.09E-08 | 0.098141613                | -3.34899 | 8.43E-06 |

|                        |          |             |          |          |
|------------------------|----------|-------------|----------|----------|
| t00008082_to_t00014138 | 2.13E-08 | 0.174687982 | -2.51715 | 1.09E-05 |
| t00012442_to_t00027084 | 3.37E-08 | 0.100835035 | -3.30993 | 1.30E-05 |
| t00013048_to_t00014138 | 1.74E-07 | 0.207935196 | -2.26579 | 4.54E-05 |
| t00012442_to_t00024222 | 1.77E-07 | 0.05418495  | -4.20596 | 4.54E-05 |
| t00011350_to_t00026874 | 2.52E-07 | 0.172392307 | -2.53623 | 5.17E-05 |
| t00011350_to_t00015863 | 2.68E-07 | 0.043956405 | -4.50778 | 5.17E-05 |
| t00005497_to_t00022458 | 3.93E-07 | 0.073003354 | -3.77589 | 6.72E-05 |
| t00012442_to_t00017495 | 5.64E-07 | 0.113285421 | -3.14197 | 7.49E-05 |
| t00012442_to_t00028073 | 5.68E-07 | 0.116567682 | -3.10076 | 7.49E-05 |
| t00013071_to_t00014138 | 5.84E-07 | 0.302577617 | -1.72462 | 7.49E-05 |
| t00020112_to_t00022458 | 6.71E-07 | 0.101593964 | -3.29911 | 7.94E-05 |
| t00013071_to_t00026874 | 8.86E-07 | 0.207433074 | -2.26928 | 9.74E-05 |
| t00011350_to_t00014455 | 1.04E-06 | 0.067605323 | -3.88672 | 0.000106 |
| t00008082_to_t00009731 | 1.11E-06 | 0.08744513  | -3.51548 | 0.000106 |
| t00012442_to_t00020738 | 1.29E-06 | 0.112583955 | -3.15093 | 0.000113 |
| t00008082_to_t00026874 | 1.32E-06 | 0.115307157 | -3.11645 | 0.000113 |
| t00008082_to_t00015863 | 1.43E-06 | 0.028823983 | -5.11659 | 0.000113 |
| t00012442_to_t00030441 | 1.47E-06 | 0.139116996 | -2.84563 | 0.000113 |
| t00011350_to_t00013099 | 1.90E-06 | 0.069036755 | -3.85649 | 0.00014  |
| t00011350_to_t00021234 | 2.14E-06 | 0.162925758 | -2.61771 | 0.00015  |
| t00012442_to_t00014138 | 2.25E-06 | 0.057910914 | -4.11002 | 0.000151 |
| t00012442_to_t00024854 | 2.44E-06 | 0.109351464 | -3.19296 | 0.000156 |
| t00012442_to_t00026874 | 2.62E-06 | 0.031368381 | -4.99455 | 0.000161 |
| t00013048_to_t00015863 | 3.04E-06 | 0.037951298 | -4.71971 | 0.000163 |
| t00006292_to_t00024222 | 3.12E-06 | 0.10049151  | -3.31485 | 0.000163 |
| t00014475_to_t00015863 | 3.14E-06 | 0.105928158 | -3.23884 | 0.000163 |
| t00012442_to_t00014475 | 3.17E-06 | 0.13253642  | -2.91554 | 0.000163 |

|                        |          |             |          |          |
|------------------------|----------|-------------|----------|----------|
| t00006292_to_t00011195 | 3.18E-06 | 0.221730495 | -2.17312 | 0.000163 |
| t00015295_to_t00015863 | 3.31E-06 | 0.134923409 | -2.88979 | 0.000164 |
| t00006292_to_t00006414 | 3.62E-06 | 0.016442251 | -5.92645 | 0.000174 |
| t00014138_to_t00022458 | 3.89E-06 | 0.169366715 | -2.56178 | 0.000181 |
| t00013048_to_t00026874 | 4.76E-06 | 0.145185941 | -2.78403 | 0.000216 |
| t00013048_to_t00022420 | 4.97E-06 | 0.126316116 | -2.98489 | 0.000219 |
| t00006414_to_t00012442 | 6.04E-06 | 14.98026231 | 3.904991 | 0.000258 |
| t00003437_to_t00022458 | 6.85E-06 | 0.106119268 | -3.23624 | 0.000285 |
| t00008082_to_t00014455 | 7.07E-06 | 0.049480109 | -4.33701 | 0.000286 |
| t00011350_to_t00022420 | 7.68E-06 | 0.139137476 | -2.84542 | 0.000297 |
| t00027162_to_t00029490 | 7.70E-06 | 0.073378025 | -3.76851 | 0.000297 |
| t00008082_to_t00022420 | 8.35E-06 | 0.08257643  | -3.59813 | 0.00031  |
| t00005497_to_t00006414 | 8.45E-06 | 0.045340826 | -4.46305 | 0.00031  |
| t00013048_to_t00029490 | 1.08E-05 | 0.08709595  | -3.52125 | 0.000387 |
| t00004817_to_t00022458 | 1.11E-05 | 0.060812368 | -4.03949 | 0.00039  |
| t00006292_to_t00017015 | 1.25E-05 | 0.054134715 | -4.2073  | 0.000421 |
| t00017495_to_t00022458 | 1.26E-05 | 0.086579716 | -3.52983 | 0.000421 |
| t00008082_to_t00024222 | 1.30E-05 | 0.11961975  | -3.06347 | 0.000427 |
| t00013071_to_t00014455 | 1.35E-05 | 0.084377511 | -3.567   | 0.000432 |
| t00013071_to_t00013099 | 1.39E-05 | 0.073818412 | -3.75988 | 0.000438 |
| t00014138_to_t00015863 | 1.44E-05 | 0.163746611 | -2.61046 | 0.000444 |
| t00015616_to_t00015863 | 1.54E-05 | 0.106540317 | -3.23053 | 0.000466 |
| t00014005_to_t00014455 | 1.63E-05 | 0.29682123  | -1.75233 | 0.000484 |
| t00013071_to_t00021234 | 1.82E-05 | 0.213575681 | -2.22718 | 0.000522 |
| t00013048_to_t00013099 | 1.88E-05 | 0.051155564 | -4.28897 | 0.000522 |
| t00014475_to_t00022458 | 1.89E-05 | 0.099157626 | -3.33413 | 0.000522 |
| t00005497_to_t00006887 | 1.91E-05 | 0.11030274  | -3.18046 | 0.000522 |

|                        |          |             |          |          |
|------------------------|----------|-------------|----------|----------|
| t00013071_to_t00017015 | 1.93E-05 | 0.153491294 | -2.70377 | 0.000522 |
| t00012442_to_t00022458 | 2.00E-05 | 0.009529647 | -6.71336 | 0.000524 |
| t00012442_to_t00024402 | 2.05E-05 | 0.045201078 | -4.4675  | 0.000524 |
| t00006292_to_t00027084 | 2.06E-05 | 0.202084607 | -2.30697 | 0.000524 |
| t00006887_to_t00012442 | 2.10E-05 | 13.39195674 | 3.743295 | 0.000524 |
| t00011350_to_t00017015 | 2.14E-05 | 0.087609703 | -3.51277 | 0.000524 |
| t00011350_to_t00029490 | 2.15E-05 | 0.090839872 | -3.46053 | 0.000524 |
| t00013071_to_t00022420 | 2.27E-05 | 0.179867998 | -2.47499 | 0.000539 |
| t00012442_to_t00015882 | 2.28E-05 | 0.136685548 | -2.87107 | 0.000539 |
| t00007033_to_t00015863 | 2.33E-05 | 0.10935623  | -3.19289 | 0.000545 |
| t00012442_to_t00015616 | 2.42E-05 | 0.141288009 | -2.82329 | 0.000554 |
| t00004817_to_t00006414 | 2.46E-05 | 0.033452719 | -4.90173 | 0.000554 |
| t00021504_to_t00022458 | 2.49E-05 | 0.063409043 | -3.97917 | 0.000554 |
| t00011350_to_t00022458 | 2.52E-05 | 0.039754782 | -4.65273 | 0.000554 |
| t00016527_to_t00022458 | 2.63E-05 | 0.116231585 | -3.10493 | 0.000571 |
| t00014475_to_t00026874 | 2.85E-05 | 0.299845866 | -1.73771 | 0.000609 |
| t00008082_to_t00029490 | 2.97E-05 | 0.046877331 | -4.41497 | 0.000619 |
| t00009667_to_t00022458 | 2.98E-05 | 0.11015551  | -3.18239 | 0.000619 |
| t00014005_to_t00022458 | 3.07E-05 | 0.162364107 | -2.6227  | 0.000631 |
| t00008082_to_t00021234 | 3.13E-05 | 0.093883134 | -3.41299 | 0.000633 |
| t00004817_to_t00015863 | 3.17E-05 | 0.062571983 | -3.99834 | 0.000633 |
| t00013071_to_t00015863 | 3.26E-05 | 0.052508413 | -4.25131 | 0.000638 |
| t00024059_to_t00024222 | 3.27E-05 | 0.290526969 | -1.78326 | 0.000638 |
| t00006292_to_t00015863 | 3.49E-05 | 0.034163909 | -4.87138 | 0.00067  |
| t00006292_to_t00007970 | 3.53E-05 | 0.065492798 | -3.93252 | 0.00067  |
| t00011567_to_t00024222 | 3.58E-05 | 0.195053546 | -2.35806 | 0.000672 |
| t00014455_to_t00027940 | 3.64E-05 | 3.950317716 | 1.981969 | 0.000675 |

|                        |          |             |          |          |
|------------------------|----------|-------------|----------|----------|
| t00013048_to_t00024222 | 3.77E-05 | 0.190693704 | -2.39067 | 0.000692 |
| t00012442_to_t00013099 | 4.00E-05 | 0.014076036 | -6.15062 | 0.000724 |
| t00004817_to_t00026874 | 4.04E-05 | 0.194658355 | -2.36098 | 0.000724 |
| t00019661_to_t00022458 | 4.24E-05 | 0.158450594 | -2.6579  | 0.00074  |
| t00013048_to_t00017015 | 4.26E-05 | 0.101831899 | -3.29574 | 0.00074  |
| t00007033_to_t00026874 | 4.27E-05 | 0.287344874 | -1.79914 | 0.00074  |
| t00024522_to_t00027084 | 4.35E-05 | 0.248267472 | -2.01003 | 0.000744 |
| t00006292_to_t00006887 | 4.40E-05 | 0.055224491 | -4.17855 | 0.000745 |
| t00024522_to_t00029490 | 4.50E-05 | 0.047239922 | -4.40385 | 0.000753 |
| t00015882_to_t00022458 | 4.73E-05 | 0.081398534 | -3.61885 | 0.000783 |
| t00003437_to_t00006414 | 4.91E-05 | 0.049516765 | -4.33594 | 0.000805 |
| t00008082_to_t00009667 | 4.99E-05 | 0.285633825 | -1.80776 | 0.000809 |
| t00012442_to_t00014455 | 5.38E-05 | 0.01358393  | -6.20196 | 0.000863 |
| t00006292_to_t00022458 | 5.45E-05 | 0.037372026 | -4.7419  | 0.000863 |
| t00004817_to_t00007970 | 5.49E-05 | 0.216209921 | -2.2095  | 0.000863 |
| t00009667_to_t00015863 | 5.70E-05 | 0.124685079 | -3.00364 | 0.000881 |
| t00008082_to_t00013099 | 5.72E-05 | 0.044038662 | -4.50509 | 0.000881 |
| t00011567_to_t00017015 | 5.86E-05 | 0.093594824 | -3.41743 | 0.000893 |
| t00012442_to_t00022420 | 5.97E-05 | 0.025494092 | -5.29369 | 0.000901 |
| t00008082_to_t00030441 | 6.57E-05 | 0.280740507 | -1.83269 | 0.000982 |
| t00012442_to_t00016527 | 6.64E-05 | 0.083885669 | -3.57543 | 0.000984 |
